# Supplementary material for: A multimetallic iron(ii)–lithium complex as a catalyst for ε-caprolactone polymerization
Source: Royal Society of Chemistry journal article supplement (doi:10.1039/c6dt00078a), 2016-01-01
Supplement: c6dt00078a1.pdf [file c6dt00078a1.pdf]

## Supporting Information

### **A Multimetallic Iron(II)-Lithium Complex as Catalyst for $\epsilon$ -Caprolactone Polymerization**

**Chao Geng,<sup>a</sup> Ying Peng,<sup>\*a</sup> Lijuan Wang,<sup>a</sup> Herbert W. Roesky,<sup>\*b</sup> and Kaipeng  
Liu<sup>a</sup>**

<sup>a</sup>. State Key Laboratory of Fine Chemicals, School of Pharmaceutical Science and Technology,  
Dalian University of Technology, Dalian 116024, P. R. China. E-mail: ypeng@dlut.edu.cn

<sup>b</sup>. Institut für Anorganische Chemie, Universität Göttingen, Tammannstrasse 4, 37077 Göttingen  
(Germany). E-mail: hroesky@gwdg.de

## Contents

- Fig. S1**  $^1\text{H}$  NMR spectrum of complex **1**.
- Fig. S2**  $^1\text{H}$  NMR spectrum for reaction of **1** +  $\epsilon$ -CL after 20 min in  $\text{C}_6\text{D}_6$  at 50 °C.
- Fig. S3**  $^1\text{H}$  NMR spectrum for reaction of **1** + 10  $\epsilon$ -CL after 6 min in  $\text{C}_6\text{D}_6$  at 50 °C.
- Fig. S4**  $^1\text{H}$  NMR spectrum of PCL catalyzed by complex **1** in toluene at 50 °C after 30 min, and quenched by 10% HCl/EtOH.
- Fig. S5** MALDI-TOF mass spectrum of PCL catalyzed by complex **1** with 10 : 1 [ $\epsilon$ -CL] / [Fe] ratio after 20 min in toluene at 25 °C.
- Fig. S6** MALDI-TOF mass spectrum of PCL catalyzed by complex **1** with 10 : 1 [ $\epsilon$ -CL] / [Fe] ratio after 30 min in toluene at 50 °C, and quenched by 10% HCl/EtOH.

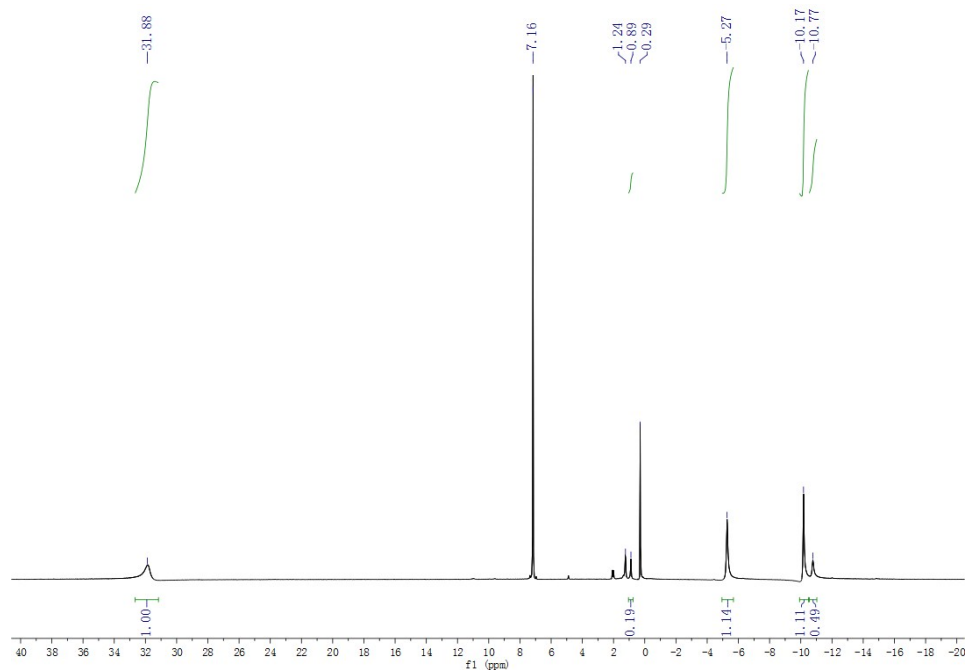

**Fig. S1**  $^1\text{H}$  NMR spectrum of complex **1**. The signals at 1.24, 0.89 ppm attribute to the protons of co-crystallized hexane molecule.

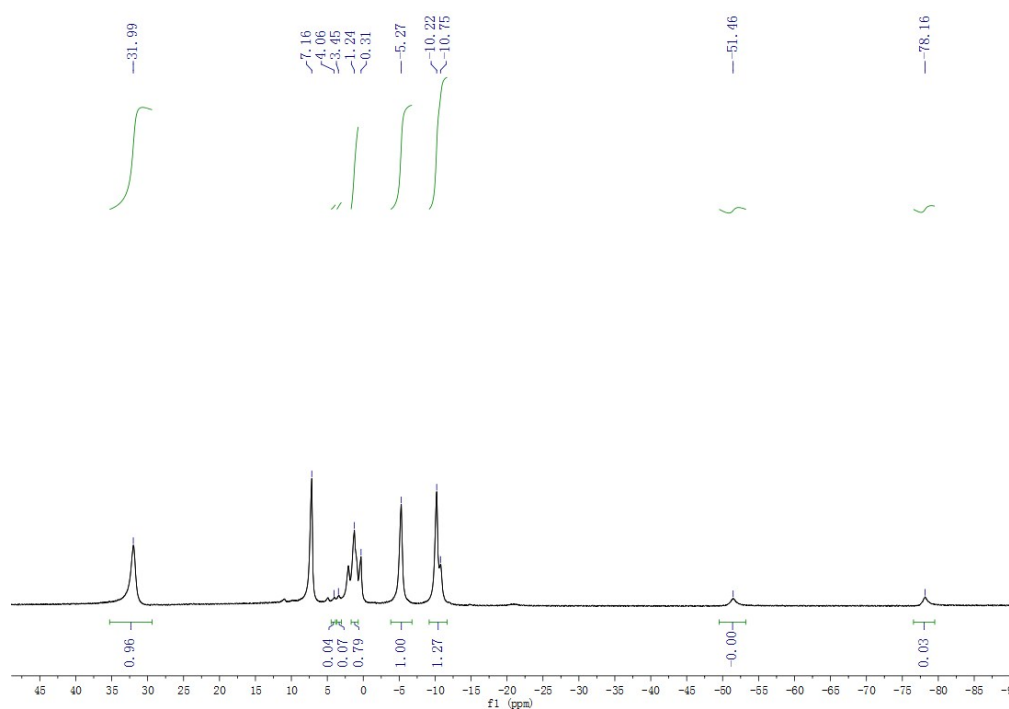

**Fig. S2**  $^1\text{H}$  NMR spectrum for reaction of **1** +  $\epsilon$ -CL after 20 min in  $\text{C}_6\text{D}_6$  at 50 °C. The signals at 4.06, 3.45 ppm attribute to the protons of PCL and  $\epsilon$ -CL respectively.

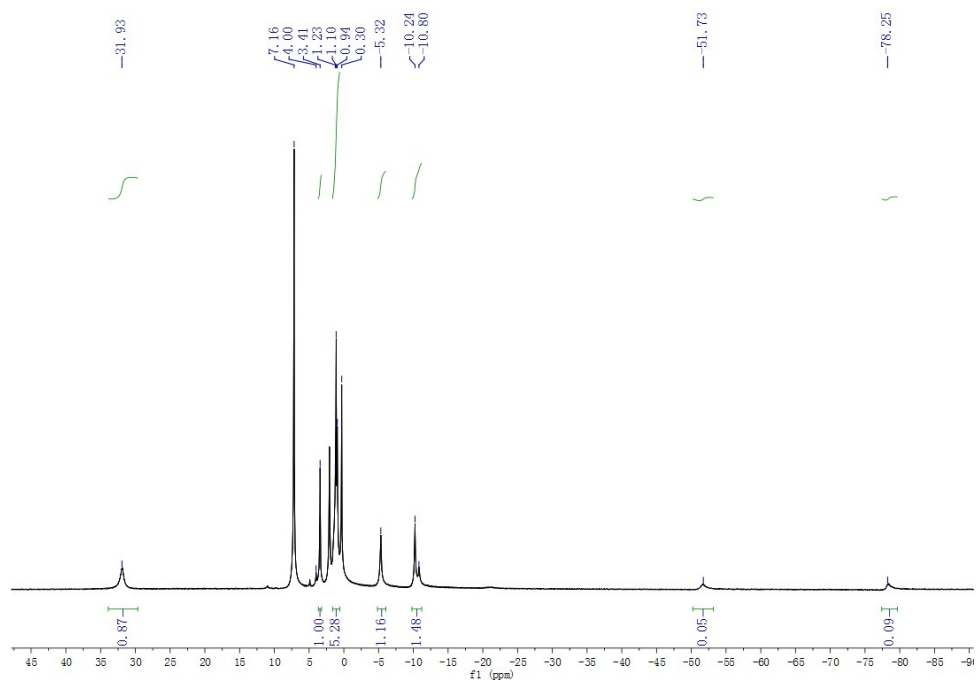

**Fig. S3**  $^1\text{H}$  NMR spectrum for reaction of **1** + 10  $\epsilon$ -CL after 6 min in  $\text{C}_6\text{D}_6$  at  $50^\circ\text{C}$ . The signals at 4.00, 3.41, 1.10 ppm attribute to the protons of PCL and  $\epsilon$ -CL respectively, and the signals at 1.23, 0.94 ppm attribute to the protons of co-crystallized hexane molecule.

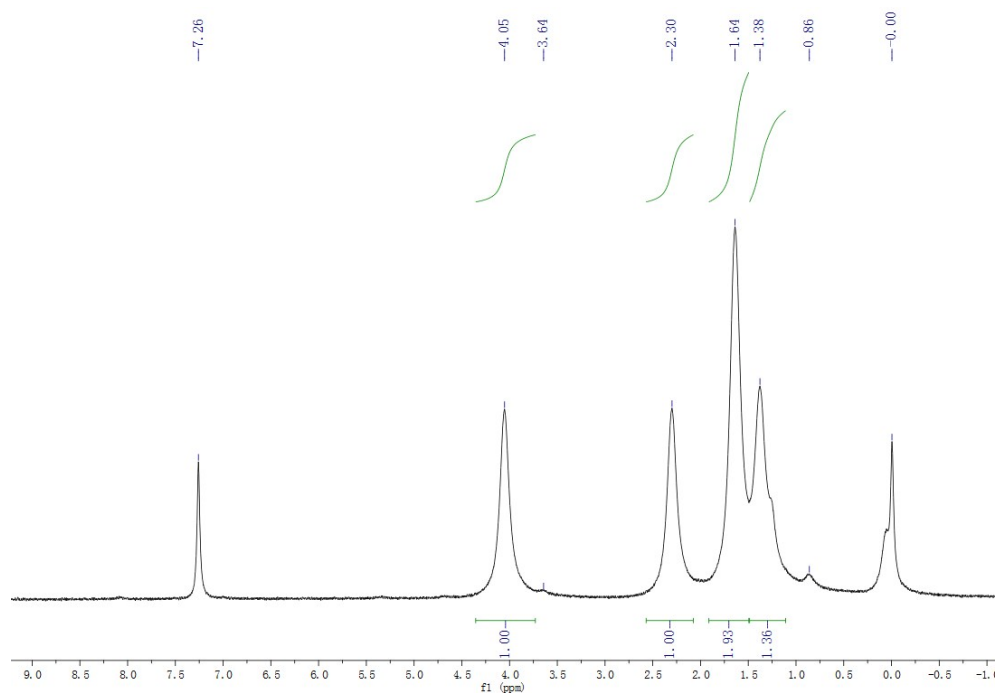

**Fig. S4**  $^1\text{H}$  NMR spectrum of PCL catalyzed by complex **1** in toluene at  $50^\circ\text{C}$  after 30 min, and quenched by 10%  $\text{HCl}/\text{EtOH}$ .

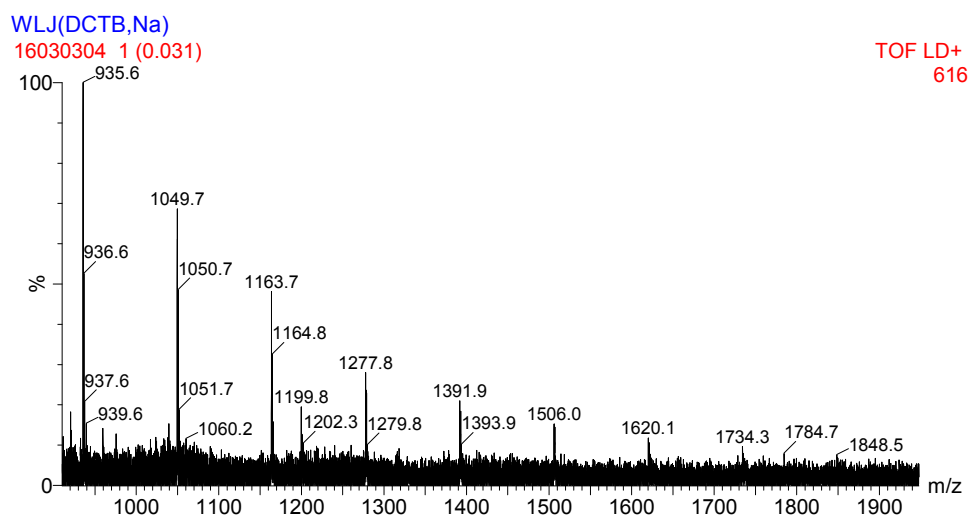

**Fig. S5** MALDI-TOF mass spectrum of PCL catalyzed by complex **1** with 10 : 1 [ε-CL] / [Fe] ratio after 20 min in toluene at 25 °C.

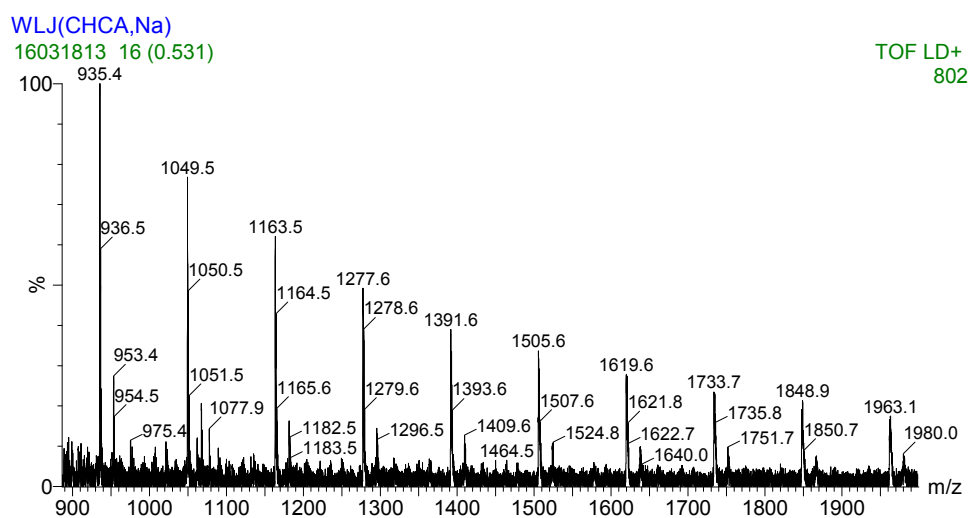

**Fig. S6** MALDI-TOF mass spectrum of PCL catalyzed by complex **1** with 10 : 1 [ε-CL] / [Fe] ratio after 30 min in toluene at 50 °C, and quenched by 10% HCl/EtOH.
